# Supplementary material
Source: ML conference proceedings conference paper supplement (https://proceedings.mlr.press/v80/xu18f.html)
Supplement: Supplementary file [file xu18f-supp.pdf]

---

# Optimal Tuning for Divide-and-conquer Kernel Ridge Regression with Massive Data

---

Ganggang Xu<sup>1</sup> Zuofeng Shang<sup>2</sup> Guang Cheng<sup>3</sup>

## 1. Technical Proofs

From now on, we suppress the dependence of  $\mathbf{A}_{kl}(\lambda)$ 's and  $\bar{\mathbf{A}}(\lambda)$  on  $\lambda$  for ease of presentation and simply use  $\mathbf{A}_{kl}$ 's and  $\bar{\mathbf{A}}$  whenever there is no ambiguity.

**Lemma S.1.** *Under the condition C1, we have that  $\lambda_{\max}(\bar{\mathbf{A}}_m \bar{\mathbf{A}}_m^T) = O_{\mathbb{P}_X}(1)$ .*

*Proof.* Define the following matrix

$$\bar{\mathbf{K}}_m = \frac{1}{m} \begin{pmatrix} \mathbf{K}_{11} & \mathbf{K}_{12} & \cdots & \mathbf{K}_{1m} \\ \mathbf{K}_{21} & \mathbf{K}_{22} & \cdots & \mathbf{K}_{2m} \\ \vdots & \vdots & \ddots & \vdots \\ \mathbf{K}_{m1} & \mathbf{K}_{m2} & \cdots & \mathbf{K}_{mm} \end{pmatrix}.$$

Then it is straightforward to see that

$$\bar{\mathbf{A}}_m \bar{\mathbf{A}}_m^T = \bar{\mathbf{K}} \mathbf{D}_1 \bar{\mathbf{K}}^T,$$

where  $\mathbf{D}_1 = \text{diag}\{\mathbf{B}_{11}, \dots, \mathbf{B}_{mm}\}$  with  $\mathbf{B}_{ll} = (\mathbf{K}_{ll} + n_l \lambda \mathbf{I}_l)^{-2}$ , for  $l = 1, \dots, m$ . Then

$$\begin{aligned} \bar{\mathbf{K}} \mathbf{D}_1 \bar{\mathbf{K}}^T &= \frac{1}{m^2} \begin{pmatrix} \mathbf{K}_{11} \\ \mathbf{K}_{21} \\ \vdots \\ \mathbf{K}_{m1} \end{pmatrix} \mathbf{B}_{11} (\mathbf{K}_{11}^T, \dots, \mathbf{K}_{m1}^T) + \dots \\ &\quad + \frac{1}{m^2} \begin{pmatrix} \mathbf{K}_{1m} \\ \mathbf{K}_{2m} \\ \vdots \\ \mathbf{K}_{mm} \end{pmatrix} \mathbf{B}_{mm} (\mathbf{K}_{1m}^T, \dots, \mathbf{K}_{mm}^T), \end{aligned}$$

---

<sup>\*</sup>Equal contribution <sup>1</sup>Department of Mathematical Sciences, Binghamton University, the State University of New York, Binghamton, NY, USA <sup>2</sup>Department of Mathematical Sciences, Indiana UniversityPurdue University Indianapolis, IN, USA <sup>3</sup>Department of Statistics, Purdue University, West Lafayette, IN, USA . Correspondence to: Ganggang Xu <gang@math.binghamton.edu>.

which implies that

$$\begin{aligned} \lambda_{\max}(\bar{\mathbf{A}}_m \bar{\mathbf{A}}_m^T) &\leq \frac{1}{m^2} \sum_{l=1}^m \lambda_{\max} \left\{ \begin{pmatrix} \mathbf{K}_{1l} \\ \mathbf{K}_{2l} \\ \vdots \\ \mathbf{K}_{ml} \end{pmatrix} \mathbf{B}_{ll} (\mathbf{K}_{1l}^T, \dots, \mathbf{K}_{ml}^T) \right\} \\ &= \frac{1}{m^2} \sum_{l=1}^m \lambda_{\max} (\mathbf{B}_{ll} \sum_{k=1}^m \mathbf{K}_{kl}^T \mathbf{K}_{kl}) \\ &= \frac{1}{m} \sum_{l=1}^m \lambda_{\max} \left\{ (\mathbf{K}_{ll} + n_l \lambda \mathbf{I}_l)^{-2} \left( \frac{1}{m} \sum_{k=1}^m \mathbf{K}_{kl}^T \mathbf{K}_{kl} \right) \right\} \\ &= O_{\mathbb{P}_X}(1). \end{aligned}$$

The last inequality follows from condition C1.  $\square$

**Lemma S.2.** *Under the conditions C1-C2, for a fixed  $\lambda$ , we have that*

$$\bar{L}(\lambda|\mathbf{X}) - \bar{R}(\lambda|\mathbf{X}) = o_{\mathbb{P}_{\varepsilon, \mathbf{X}}} \{ \bar{R}(\lambda|\mathbf{X}) \}. \quad (\text{S.1})$$

*Proof.* Using similar notations in equation (12), it is straightforward to show that

$$\bar{L}(\lambda|\mathbf{X}) = \frac{1}{N} (\bar{\mathbf{A}}_m \mathbf{Y} - \mathbf{F})^T \mathbf{W} (\bar{\mathbf{A}}_m \mathbf{Y} - \mathbf{F}), \quad (\text{S.2})$$

where  $\mathbf{Y} = \mathbf{F} + \varepsilon$ . Using (12), we have that

$$\begin{aligned} \bar{L}(\lambda|\mathbf{X}) - \bar{R}(\lambda|\mathbf{X}) &= -\frac{2}{N} \mathbf{F}^T (\mathbf{I} - \bar{\mathbf{A}}_m)^T \mathbf{W} \bar{\mathbf{A}}_m \varepsilon \\ &\quad + \frac{1}{N} \varepsilon^T \bar{\mathbf{A}}_m^T \mathbf{W} \bar{\mathbf{A}}_m \varepsilon - \frac{\sigma^2}{N} \text{tr}(\bar{\mathbf{A}}_m^T \mathbf{W} \bar{\mathbf{A}}_m). \end{aligned}$$

Since the random error  $\varepsilon$  and the covariate  $X$  are independent in model (1), to show (S.1), it suffices to show the following two equations

$$\text{Var}_{\varepsilon} \left\{ \frac{1}{N} \mathbf{F}^T (\mathbf{I} - \bar{\mathbf{A}}_m)^T \mathbf{W} \bar{\mathbf{A}}_m \varepsilon \right\} = o_{\mathbb{P}_X} \{ \bar{R}^2(\lambda|\mathbf{X}) \}, \quad (\text{S.3})$$

$$\text{Var}_{\varepsilon} \left\{ \frac{1}{N} \varepsilon^T \bar{\mathbf{A}}_m^T \mathbf{W} \bar{\mathbf{A}}_m \varepsilon \right\} = o_{\mathbb{P}_X} \{ \bar{R}^2(\lambda|\mathbf{X}) \}. \quad (\text{S.4})$$

We first show (S.3). Straightforward algebra yields that

$$\begin{aligned}
& \text{Var}_\varepsilon \left\{ \frac{1}{N} \mathbf{F}^T (\mathbf{I} - \bar{\mathbf{A}}_m)^T \mathbf{W} \bar{\mathbf{A}}_m \varepsilon \right\} \\
&= \frac{\sigma^2}{N^2} \mathbf{F}^T (\mathbf{I} - \bar{\mathbf{A}}_m)^T \mathbf{W} (\bar{\mathbf{A}}_m \bar{\mathbf{A}}_m^T) \mathbf{W} (\mathbf{I} - \bar{\mathbf{A}}_m) \mathbf{F} \\
&\leq \frac{\sigma^2 \lambda_{\max}(\bar{\mathbf{A}}_m \bar{\mathbf{A}}_m^T \mathbf{W})}{N} \frac{1}{N} \mathbf{F}^T (\mathbf{I} - \bar{\mathbf{A}}_m)^T \mathbf{W} (\mathbf{I} - \bar{\mathbf{A}}_m) \mathbf{F} \\
&\leq \frac{\sigma^2 \lambda_{\max}(\bar{\mathbf{A}}_m \bar{\mathbf{A}}_m^T) \lambda_{\max}(\mathbf{W})}{N \bar{R}(\lambda|\mathbf{X})} \bar{R}^2(\lambda|\mathbf{X}) \\
&= o_{\mathbb{P}_X}(1) \bar{R}^2(\lambda|\mathbf{X}) = o_{\mathbb{P}_X}\{\bar{R}^2(\lambda|\mathbf{X})\},
\end{aligned}$$

where the second last equation follows from conditions C2-C3 and Lemma (S.1) part (a).

Now we show (S.4). Straightforward algebra yields that

$$\begin{aligned}
& \text{Var}_\varepsilon \left\{ \frac{1}{N} \varepsilon^T \bar{\mathbf{A}}_m^T \mathbf{W} \bar{\mathbf{A}}_m \varepsilon \right\} \\
&= \frac{\mathbb{E}_\varepsilon \varepsilon^4 - \sigma^4}{N^2} \sum_{i=1}^N \bar{b}_{ii}^2 + 2\sigma^4 \sum_i \sum_{j \neq i} \bar{b}_{ij}^2 \\
&\leq \frac{K_1}{N^2} \text{tr}\{(\bar{\mathbf{A}}_m^T \mathbf{W} \bar{\mathbf{A}}_m)^2\} \\
&\leq \frac{K_1 \lambda_{\max}(\bar{\mathbf{A}}_m^T \mathbf{W} \bar{\mathbf{A}}_m)}{N^2} \text{tr}(\bar{\mathbf{A}}_m^T \mathbf{W} \bar{\mathbf{A}}_m) \\
&\leq \frac{K_1 \lambda_{\max}(\bar{\mathbf{A}}_m^T \mathbf{W} \bar{\mathbf{A}}_m)}{N \sigma^2} \bar{R}(\lambda|\mathbf{X}) \\
&\leq \frac{K_1 \lambda_{\max}(\bar{\mathbf{A}}_m^T \bar{\mathbf{A}}_m) \lambda_{\max}(\mathbf{W})}{\sigma^2 N \bar{R}(\lambda|\mathbf{X})} \bar{R}^2(\lambda|\mathbf{X}) \\
&= o_{\mathbb{P}_X}(1) \bar{R}^2(\lambda|\mathbf{X})
\end{aligned} \tag{S.5}$$

where  $\bar{b}_{ij}$  is the  $(i, j)$ th element of matrix  $\bar{\mathbf{A}}_m^T \mathbf{W} \bar{\mathbf{A}}_m$  and  $K_1 = \mathbb{E}_\varepsilon \varepsilon^4 + \sigma^4$ . The last equality follows from conditions C2-C3 and Lemma S.1. Using (S.3)-(S.4), the equation (S.1) follows from a simple application of the Cauchy-Schwartz inequality and the Markov's inequality. The proof is complete.  $\square$

**Proof of Lemma 1.** Using (S.2) and (13), we have that

$$\begin{aligned}
& \bar{U}(\lambda|\mathbf{X}) - \bar{L}(\lambda|\mathbf{X}) - \frac{1}{N} \varepsilon^T \mathbf{W} \varepsilon \\
&= \frac{2}{N} \mathbf{F}^T (\mathbf{I} - \bar{\mathbf{A}}_m)^T \mathbf{W} \varepsilon \\
&\quad - \frac{2}{N} \{ \varepsilon^T \bar{\mathbf{A}}_m \mathbf{W} \varepsilon - \sigma^2 \text{tr}(\bar{\mathbf{A}}_m \mathbf{W}) \}.
\end{aligned} \tag{S.6}$$

Notice that the random error  $\varepsilon$  and the covariate  $X$  are independent in model (1). We will show (16) using equation (S.1) in Lemma S.2, for which it suffices to show the

following two equations

$$\text{Var}_\varepsilon \left\{ \frac{1}{N} \mathbf{F}^T (\mathbf{I} - \bar{\mathbf{A}}_m)^T \mathbf{W} \varepsilon \right\} = o_{\mathbb{P}_X}\{\bar{R}^2(\lambda|\mathbf{X})\}, \tag{S.7}$$

$$\text{Var}_\varepsilon \left\{ \frac{1}{N} \varepsilon^T \bar{\mathbf{A}}_m \mathbf{W} \varepsilon \right\} = o_{\mathbb{P}_X}\{\bar{R}^2(\lambda|\mathbf{X})\}. \tag{S.8}$$

We first show (S.7). Straightforward algebra yields that

$$\begin{aligned}
& \text{Var}_\varepsilon \left\{ \frac{1}{N} \mathbf{F}^T (\mathbf{I} - \bar{\mathbf{A}}_m)^T \mathbf{W} \varepsilon \right\} \\
&= \frac{\sigma^2}{N^2} \mathbf{F}^T (\mathbf{I} - \bar{\mathbf{A}}_m)^T \mathbf{W}^2 (\mathbf{I} - \bar{\mathbf{A}}_m) \mathbf{F} \\
&\leq \frac{\sigma^2 \lambda_{\max}(\mathbf{W})}{N \bar{R}(\lambda|\mathbf{X})} \bar{R}^2(\lambda|\mathbf{X}) \\
&= o_{\mathbb{P}_X}(1) \bar{R}^2(\lambda|\mathbf{X}) = o_{\mathbb{P}_X}\{\bar{R}^2(\lambda|\mathbf{X})\},
\end{aligned}$$

where the second last equation follows from conditions C2-C3. Next, we show (S.8). Using condition C2, similar to the inequality (S.5), it is straightforward to show that

$$\begin{aligned}
& \text{Var}_\varepsilon \left\{ \frac{1}{N} \varepsilon^T \bar{\mathbf{A}}_m \mathbf{W} \varepsilon \right\} \leq \frac{K_1}{N^2} \text{tr}(\bar{\mathbf{A}}_m^T \mathbf{W}^2 \bar{\mathbf{A}}_m) \\
&\leq \frac{K_1 \lambda_{\max}(\mathbf{W})}{N \sigma^2} \bar{R}(\lambda|\mathbf{X}) \\
&= \frac{K_1 \lambda_{\max}(\mathbf{W})}{\sigma^2 N \bar{R}(\lambda|\mathbf{X})} \bar{R}^2(\lambda|\mathbf{X}) \\
&= o_{\mathbb{P}_X}(1) \bar{R}^2(\lambda|\mathbf{X}),
\end{aligned}$$

where  $K_1 = \mathbb{E}_\varepsilon \varepsilon^4 + \sigma^4$  is bounded. Hence, (S.8) is proved using, again, condition C2-C3. Using (S.7)-(S.8) and (S.1), the equation (16) follows from a simple application of the Cauchy-Schwartz inequality and the Markov's inequality. The proof is complete.  $\square$

**Proof of Theorem 1.** Using Lemma 1 and Lemma S.2, it suffices to show that

$$\text{dGCV}_{DC}(\lambda|\mathbf{X}) - \bar{U}(\lambda|\mathbf{X}) = o_{\mathbb{P}_{\varepsilon, X}}\{\bar{R}(\lambda|\mathbf{X})\}. \tag{S.9}$$

Using the first order Taylor expansion of  $(1-x)^{-2}$  around  $x=0$ , we have that  $(1-x)^{-2} = 1 + 2x + 3(1-x^*)^{-4}x^2$  for some  $x^* \in (0, x)$ . Under condition C3, we have that  $\frac{\text{tr}(\bar{\mathbf{A}}_m)}{N} = o_{\mathbb{P}_X}(1)$  and thus we can consider the following decomposition

$$\begin{aligned}
& \text{dGCV}(\lambda|\mathbf{X}) - \bar{U}(\lambda|\mathbf{X}) = \\
& \underbrace{\left\{ \frac{1}{N} \mathbf{Y}^T \{ \mathbf{I} - \bar{\mathbf{A}}_m(\lambda) \}^T \mathbf{W} \{ \mathbf{I} - \bar{\mathbf{A}}_m(\lambda) \} \mathbf{Y} - \sigma^2 \right\}}_I \frac{2 \text{tr}(\bar{\mathbf{A}}_m \mathbf{W})}{N} \\
& + \underbrace{\frac{1}{N} \mathbf{Y}^T \{ \mathbf{I} - \bar{\mathbf{A}}_m(\lambda) \}^T \mathbf{W} \{ \mathbf{I} - \bar{\mathbf{A}}_m(\lambda) \} \mathbf{Y}}_{II} o_{\mathbb{P}_X} \left( \frac{\{ \text{tr}(\bar{\mathbf{A}}_m \mathbf{W}) \}^2}{N^2} \right)
\end{aligned}$$

Using condition C4, we have that

$$\frac{\text{tr}(\bar{\mathbf{A}}_m \mathbf{W})}{N} = o_{\mathbb{P}_X} \{ \bar{R}^{1/2}(\lambda | \mathbf{X}) \}, \quad (\text{S.10})$$

which implies that  $II = o_{\mathbb{P}_X}(\bar{R}(\lambda | \mathbf{X}))$  since  $\frac{1}{N} \mathbf{Y}^T \{ \mathbf{I} - \bar{\mathbf{A}}_m(\lambda) \}^T \mathbf{W} \{ \mathbf{I} - \bar{\mathbf{A}}_m(\lambda) \} \mathbf{Y}$  is bounded. For part  $I$ , we can write

$$\begin{aligned} I &= \left\{ \frac{1}{N} \mathbf{Y}^T \{ \mathbf{I} - \bar{\mathbf{A}}_m(\lambda) \}^T \mathbf{W} \{ \mathbf{I} - \bar{\mathbf{A}}_m(\lambda) \} \mathbf{Y} - \sigma^2 \right\} \frac{2\text{tr}(\bar{\mathbf{A}}_m \mathbf{W})}{N} \\ &= \left\{ \bar{U}(\lambda | \mathbf{X}) - \frac{1}{N} \boldsymbol{\varepsilon}^T \mathbf{W} \boldsymbol{\varepsilon} \right\} \frac{2\text{tr}(\bar{\mathbf{A}}_m \mathbf{W})}{N} \\ &\quad + \left( \frac{1}{N} \boldsymbol{\varepsilon}^T \mathbf{W} \boldsymbol{\varepsilon} - \sigma^2 \right) \frac{2\text{tr}(\bar{\mathbf{A}}_m \mathbf{W})}{N} - \frac{4\{\text{tr}(\bar{\mathbf{A}}_m \mathbf{W})\}^2 \sigma^2}{N^2}. \end{aligned}$$

By Lemma 1, we have that  $\bar{U}(\lambda | \mathbf{X}) - \frac{1}{N} \boldsymbol{\varepsilon}^T \mathbf{W} \boldsymbol{\varepsilon} = \bar{R}(\lambda | \mathbf{X}) + o_{\mathbb{P}_{\varepsilon, X}} \{ \bar{R}(\lambda | \mathbf{X}) \}$ . Under condition C3, one has that  $\frac{\text{tr}(\bar{\mathbf{A}}_m \mathbf{W})}{N} = o_{\mathbb{P}_X}(1)$ , and thus

$$\left\{ \bar{U}(\lambda | \mathbf{X}) - \frac{1}{N} \boldsymbol{\varepsilon}^T \mathbf{W} \boldsymbol{\varepsilon} \right\} \frac{2\text{tr}(\bar{\mathbf{A}}_m \mathbf{W})}{N} = o_{\mathbb{P}_{\varepsilon, X}} \{ \bar{R}(\lambda | \mathbf{X}) \}.$$

Furthermore, since  $\frac{1}{N} \boldsymbol{\varepsilon}^T \mathbf{W} \boldsymbol{\varepsilon} - \sigma^2 = O_{\mathbb{P}_{\varepsilon}}(N^{-1/2})$  (condition C3 (a)) and  $N \bar{R}(\lambda | \mathbf{X}) \xrightarrow{\mathbb{P}_X} \infty$  (condition C2), we have that  $\frac{1}{N} \boldsymbol{\varepsilon}^T \mathbf{W} \boldsymbol{\varepsilon} - \sigma^2 = o_{\mathbb{P}_{\varepsilon, X}} \{ \bar{R}^{1/2}(\lambda | \mathbf{X}) \}$ . Using this and equation (S.10), we have that

$$\left( \frac{1}{N} \boldsymbol{\varepsilon}^T \mathbf{W} \boldsymbol{\varepsilon} - \sigma^2 \right) \frac{2\text{tr}(\bar{\mathbf{A}}_m \mathbf{W})}{N} = o_{\mathbb{P}_{\varepsilon, X}} \{ \bar{R}(\lambda | \mathbf{X}) \}.$$

The third part of  $I$  is  $o_{\mathbb{P}_X} \{ \bar{R}(\lambda | \mathbf{X}) \}$  due to equation (S.10). Therefore, we have shown that

$$\text{dGCV}(\lambda | \mathbf{X}) - \bar{U}(\lambda | \mathbf{X}) = o_{\mathbb{P}_{\varepsilon, X}} \{ \bar{R}(\lambda | \mathbf{X}) \},$$

which completes the proof.  $\square$
